# Supplementary material
Source: Springer Nature journal article supplement (https://www.springermedizin.de/resource/supplementary/12885_2011_2841_MOESM5_ESM.pdf/9462164)

## PC-3-Migration

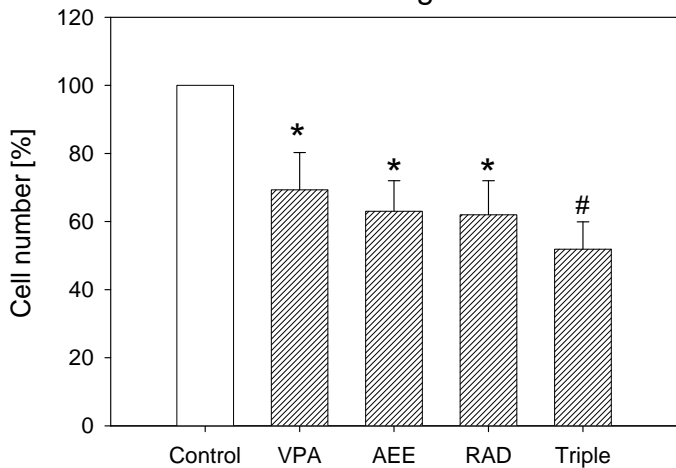

## LNCaP-Migration

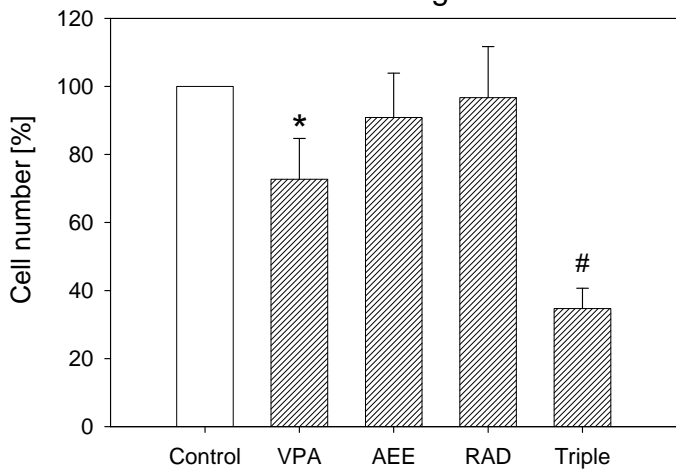

Supplement: MOESM5 [file 9462164]
